# Supplementary material
Source: PubMed Central journal article supplement (PMC6117836)
Supplement: NIHMS963603-supplement-1.pdf [file NIHMS963603-supplement-1.pdf]

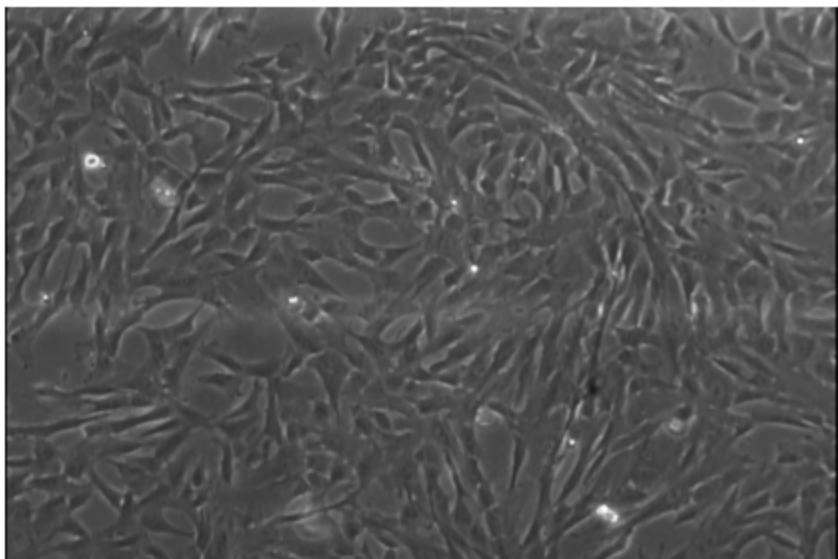

Preterm WJ-MSCs - 16 hours after 90% oxygen exposure

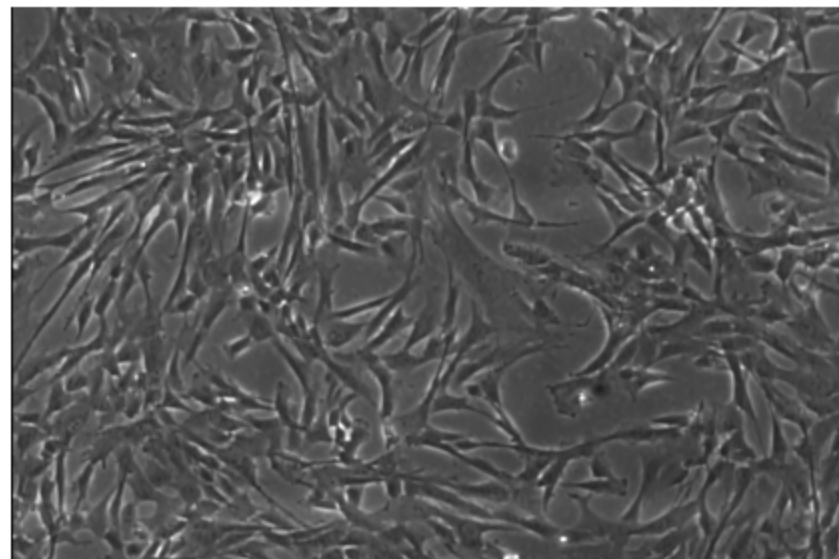

Preterm WJ-MSCs - 24hours after 90% oxygen exposure

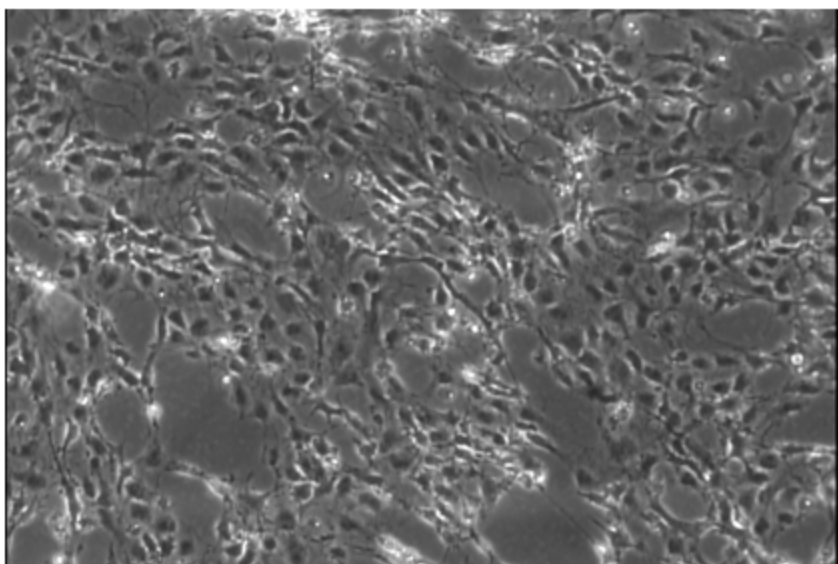

Preterm WJ-MSCs - 44 hours after 90% oxygen exposure

Suppl. Fig. 1a

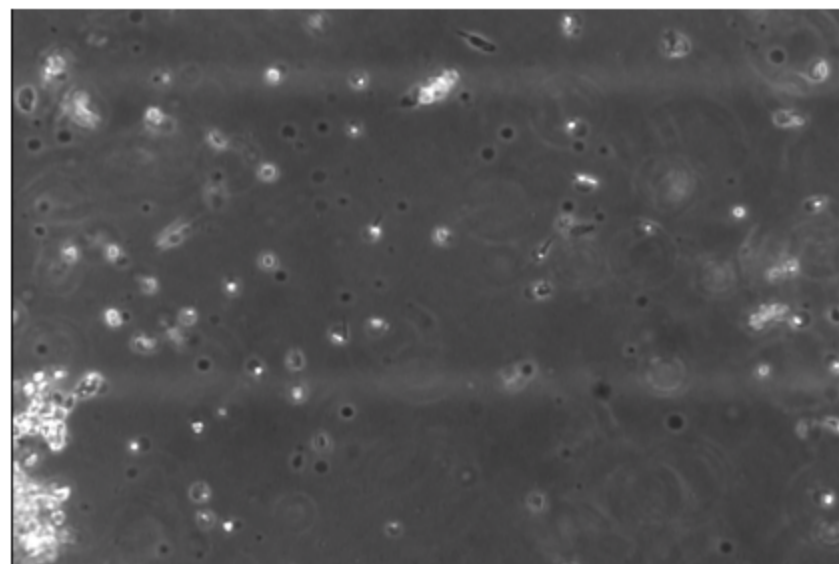

Preterm WJ-MSCs - 48 hours after 90% oxygen exposure

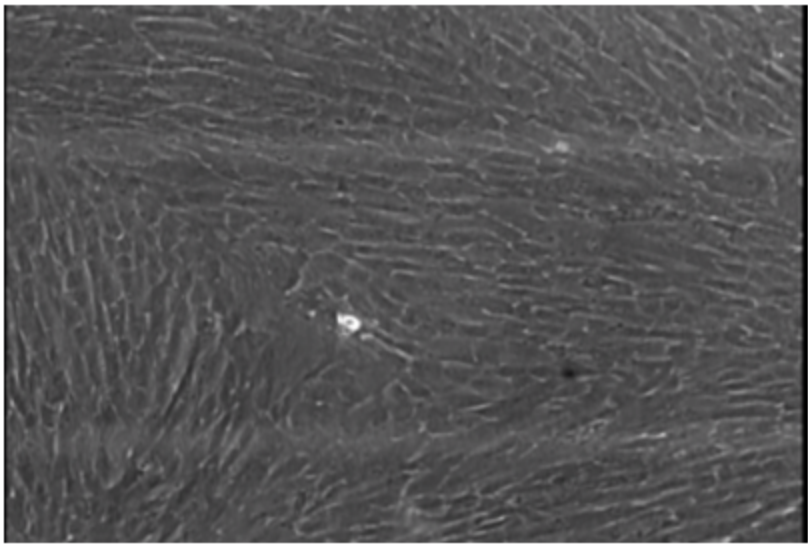

Term WJ-MSCs - 16 hours after 90% oxygen exposure

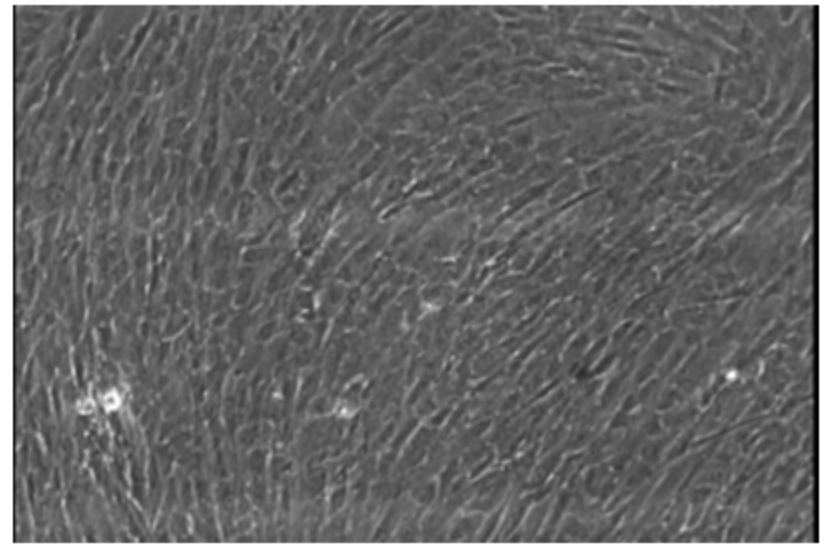

Term WJ-MSCs - 24 hours after 90% oxygen exposure

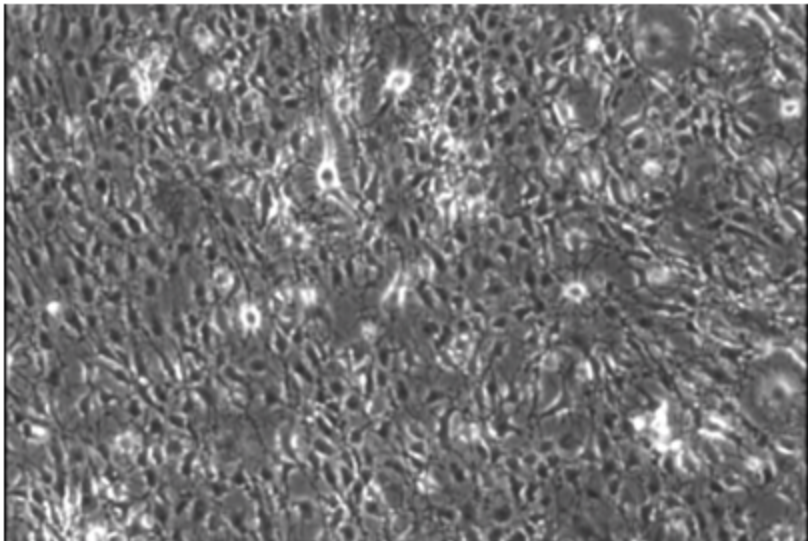

Term WJ-MSCs - 44 hours after 90% oxygen exposure

Suppl. Fig. 1b

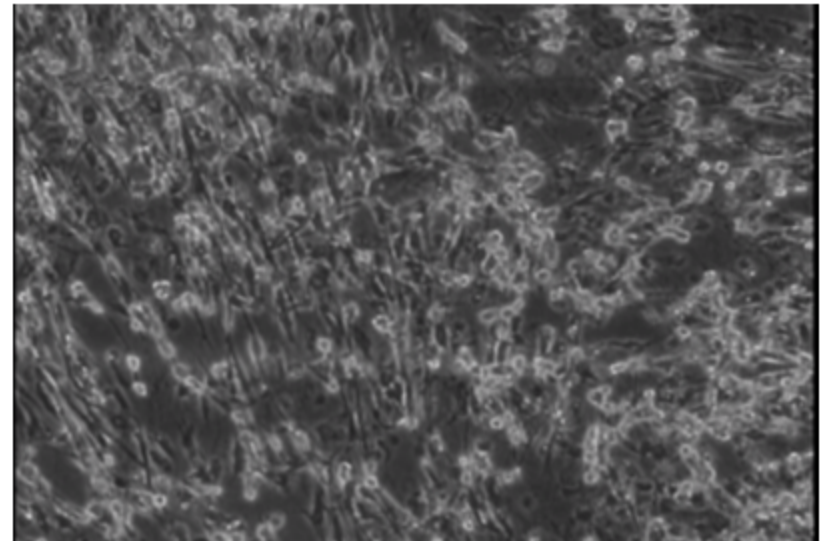

Term WJ-MSCs - 48 hours after 90% oxygen exposure
